# Supplementary material
Source: PubMed Central journal article supplement (PMC5510002)
Supplement: EMBJ-36-2126-s001.pdf [file EMBJ-36-2126-s001.pdf]

## Expanded View Figures

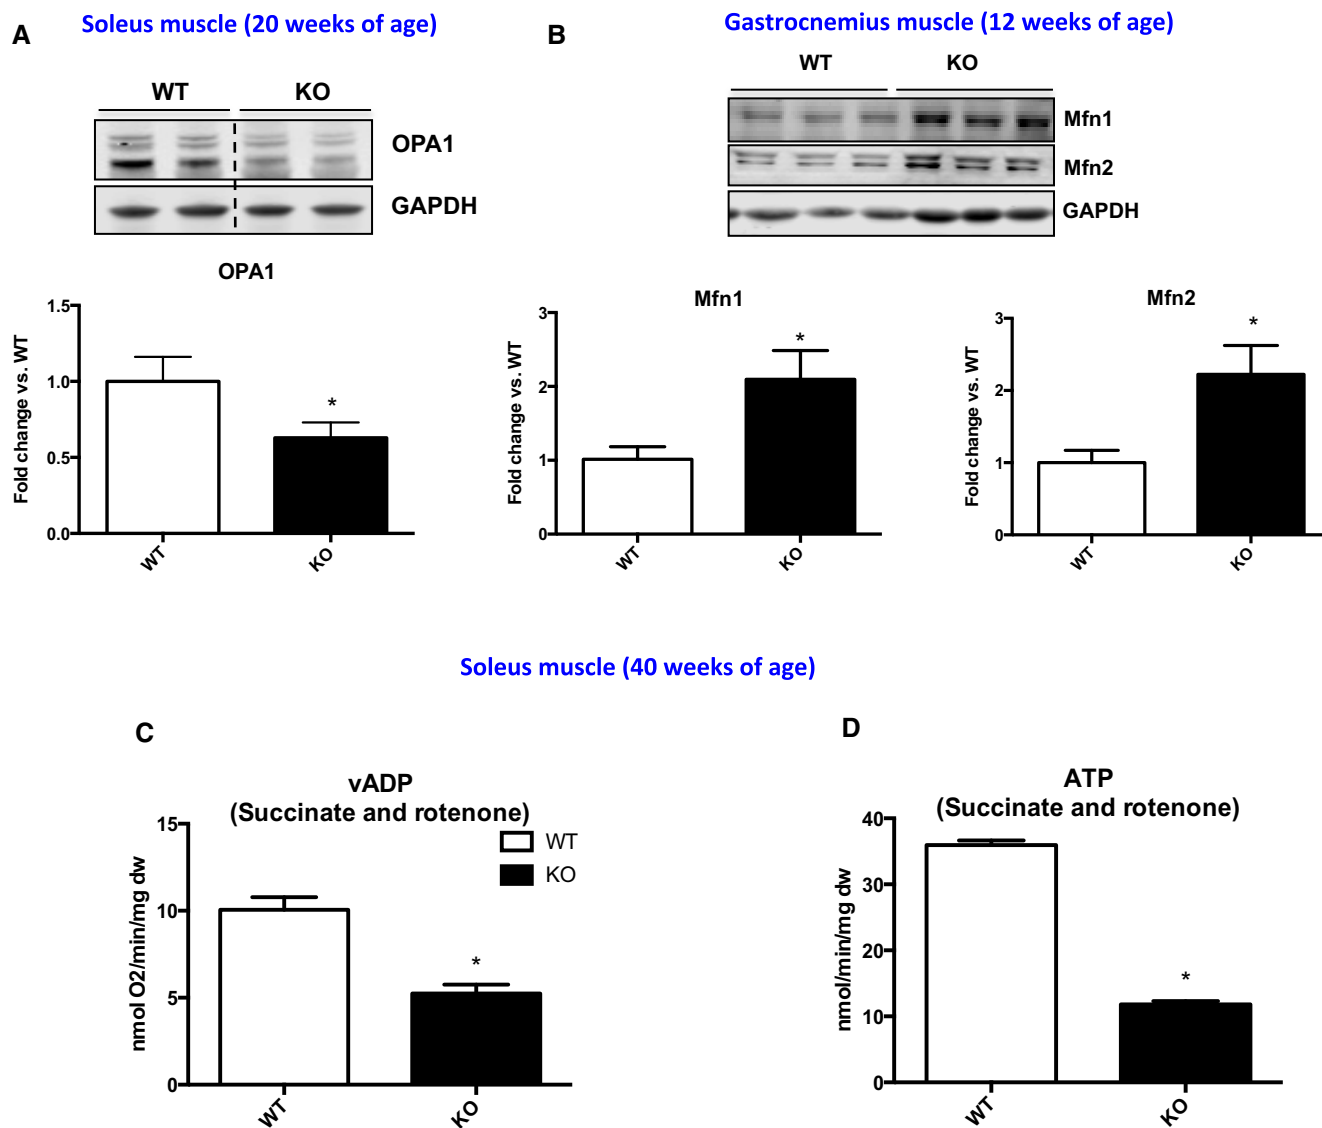

**Figure EV1. Mitochondrial dynamics proteins and mitochondrial oxygen consumption.**

A, B Representative immunoblots and densitometric quantification in muscle homogenates from WT and mOPA1 KO mice. (A) OPA1 levels in soleus muscle normalized to GAPDH ( $n = 3$ ). (B) Mfn1 and Mfn2 normalized to GAPDH ( $n = 4-5$ ).

C Maximally stimulated succinate-supported mitochondrial respirations in soleus from 40-week-old WT and mOPA1 KO (KO) mice ( $n = 5$ ).

D Succinate-supported ATP synthesis rates in soleus from 40-week-old WT and mOPA1 KO (KO) mice ( $n = 5$ ).

Data information: Data are expressed as means  $\pm$  SEM. Significant differences were determined by Student's *t*-test, using a significance level of  $P < 0.05$ . (\*) Significantly different vs. WT mice.

Source data are available online for this figure.

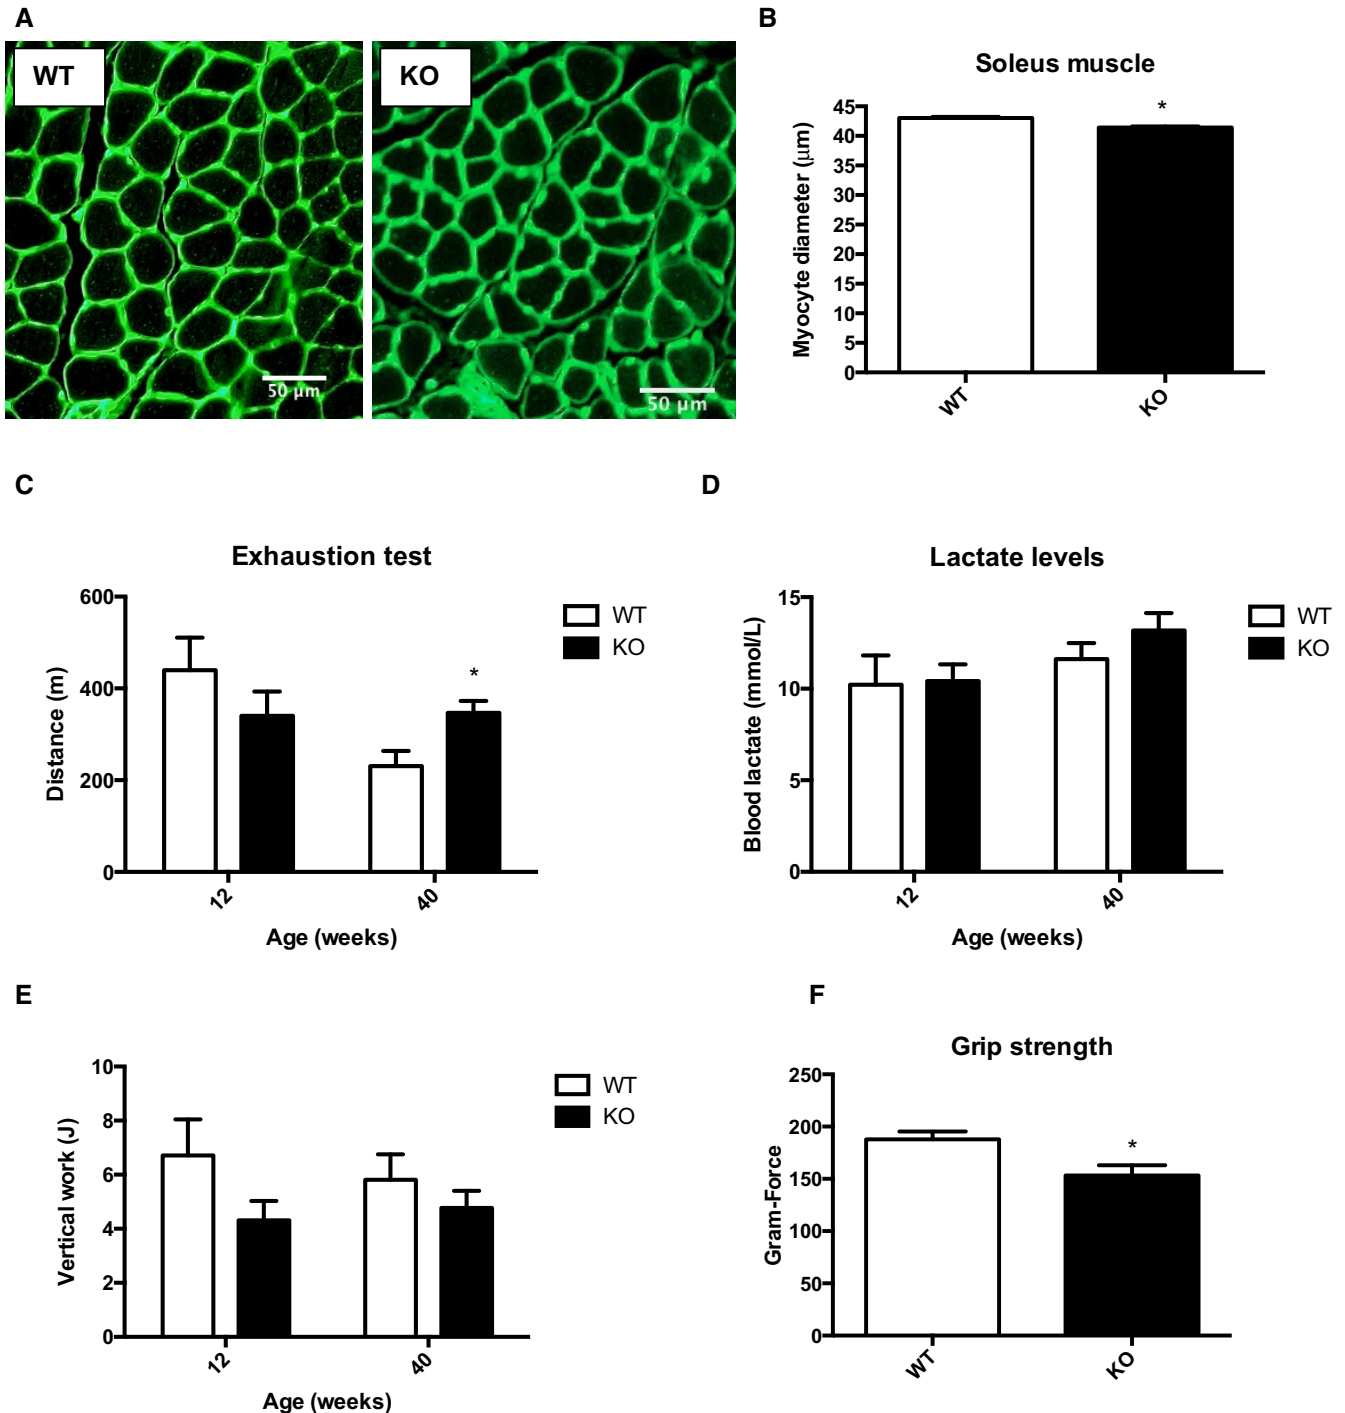

**Figure EV2. Assessment of overall muscle health of mOPA1 KO mice.**

A Cross sections of soleus muscle from 20-week-old mice stained with wheat-germ agglutinin (WGA). Scale bar = 50  $\mu$ m.

B Measurements of muscle fiber diameter in soleus muscle from 20-week-old mice ( $n = 4$ ).

C Exhaustion test in 20- and 40-week-old WT and mOPA1 KO mice ( $n = 4-9$ ).

D Blood lactate after the exhaustion test ( $n = 4-9$ ).

E Measurements of vertical work performed by 20- and 40-week-old mice during the exhaustion test ( $n = 4-9$ ).

F Measurements of grip strength in 40-week-old mice ( $n = 5$ ).

Data information: Data are expressed as means  $\pm$  SEM. Significant differences were determined by Student's  $t$ -test, using a significance level of  $P < 0.05$ . (\*) Significantly different vs. WT mice.

Source data are available online for this figure.

**Figure EV3. Metabolic parameters in mOPA1 KO mice.**

- A Triglycerides levels in mice fed either a control or a HFD for 12 weeks ( $n = 5-6$ ).
- B Fasting triglyceride levels in the serum of mice fed either a control or a HFD for 12 weeks ( $n = 5-8$ ).
- C *IL-15* and *IL-6* mRNA expression in gastrocnemius muscle of 20-week-old WT and mOPA1 KO mice ( $n = 4-5$ ).
- D Representative immunoblot and densitometric quantification of OPA1 and FGF21 normalized to GAPDH in soleus muscle of 20-week-old mice ( $n = 3$ ).
- E Representative immunoblot and densitometric quantification of PGC-1 $\alpha$  and UCP1 normalized to GAPDH in BAT of 20-week-old mice ( $n = 4$ ).
- F Representative immunoblot and densitometric quantification of PGC-1 $\alpha$  and UCP1 normalized to GAPDH in sc-WAT of 20-week-old mice ( $n = 3-4$ ). Data are represented as fold change vs. WT mice.

Data information: Data are expressed as means  $\pm$  SEM. Significant differences were determined by Student's *t*-test (D, F), using a significance level of  $P < 0.05$  or by ANOVA followed by Tukey multiple comparison test (A, B), using a significance level of  $P < 0.05$ . (\*) Significantly different vs. WT mice. (\*) vs. WT Cont (#) vs. WT HFD. Source data are available online for this figure.

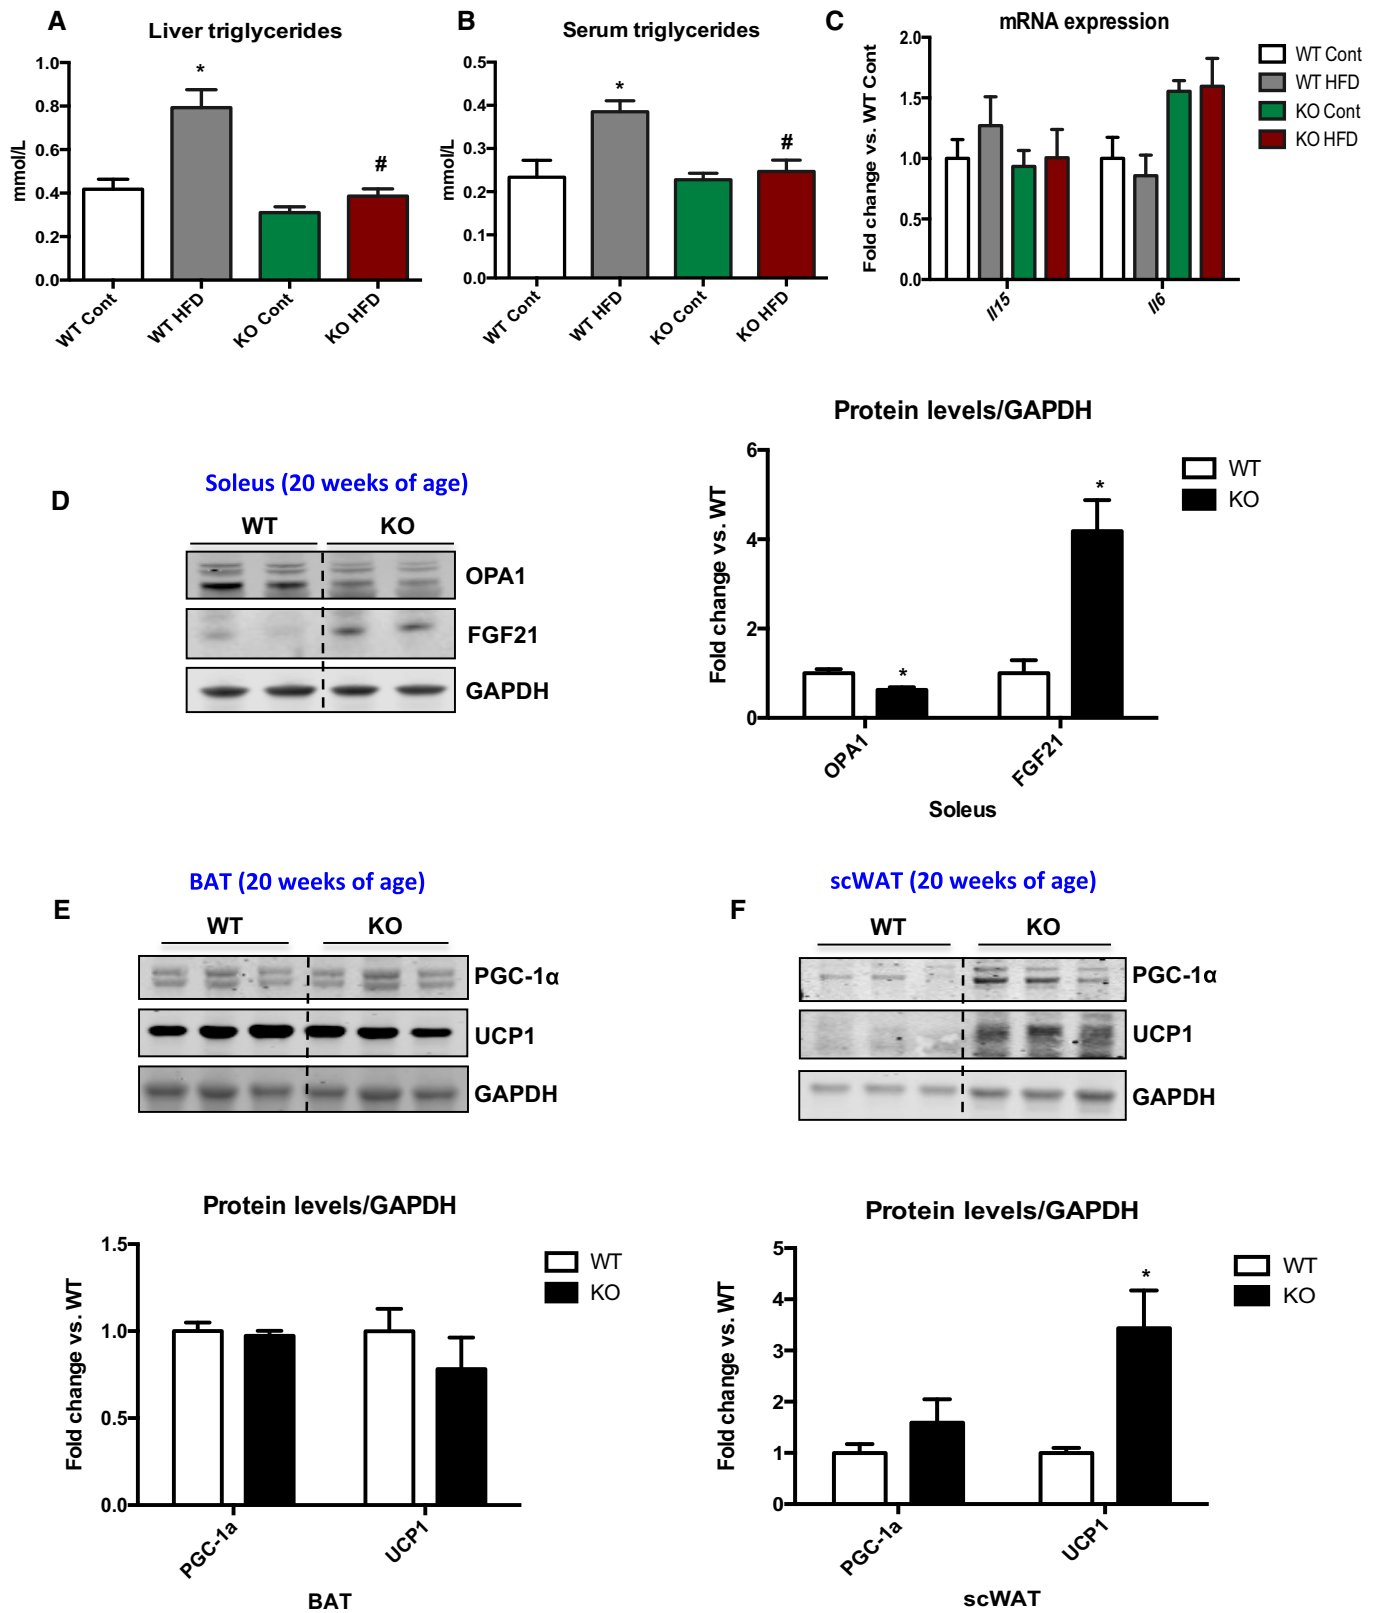

Figure EV3.

**Figure EV4. Assessment of overall mitochondrial function and muscle health in mOPA1/FGF21 DKO mice.**

- A Representative immunoblots and densitometric quantification of OPA1 normalized to GAPDH in gastrocnemius muscle from 12-week-old WT and mOPA1/FGF21 KO mice ( $n = 3$ ).
- B BN-PAGE in gastrocnemius muscle of 12-week-old mice ( $n = 4$ ).
- C mtDNA copy number in gastrocnemius muscle of 12-week-old mice ( $n = 3-4$ ).
- D Maximally stimulated succinate-supported mitochondrial respirations in soleus from 20-week-old mice ( $n = 4-6$ ).
- E Succinate-supported ATP synthesis rates in soleus from 20-week-old mice ( $n = 4-5$ ).
- F Maximally stimulated succinate-supported mitochondrial respirations in soleus from 40-week-old mice ( $n = 5$ ).
- G Measurements of grip strength in 40-week-old mice ( $n = 3$ ).
- H Body weight and body composition in 20-week-old WT and DKO mice ( $n = 5-9$ ).
- I Cross sections of gastrocnemius muscle from 20-week-old mice stained with wheat-germ agglutinin (WGA). Scale bar = 50  $\mu\text{m}$ .
- J Measurements of muscle fiber diameter in gastrocnemius muscle from 20-week-old mice ( $n = 3$ ).

Data information: Data are expressed as means  $\pm$  SEM. Significant differences were determined by Student's *t*-test, using a significance level of  $P < 0.05$ . (\*) Significantly different vs. WT mice.

Source data are available online for this figure.

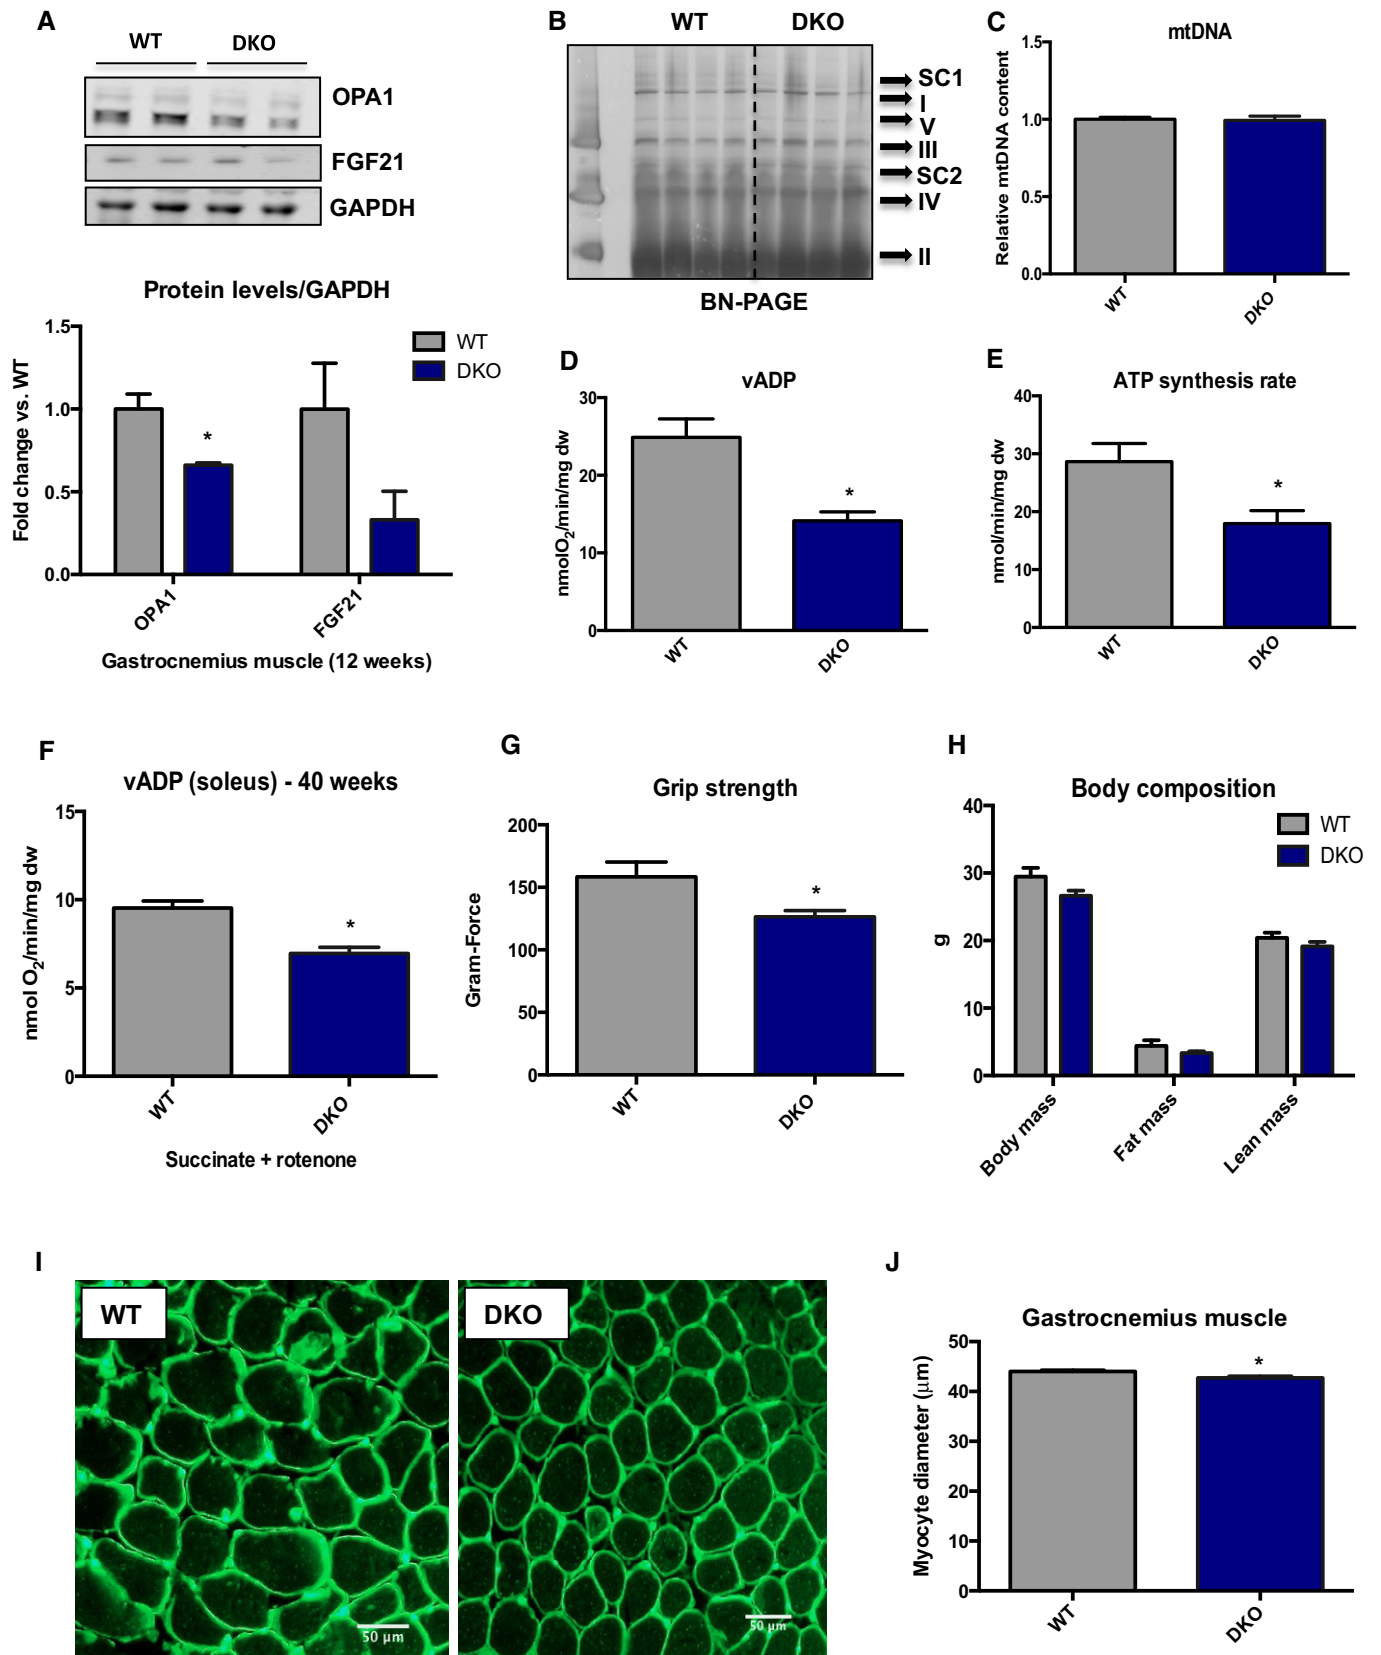

Figure EV4.

**Figure EV5. Mitochondrial stress and ER stress in C2C12 myotubes.**

- A FGF21 protein levels measured by immunoblot, in cell lysates from C2C12 myotubes treated either with vehicle, oligomycin, or tunicamycin ± PBA for 8 h. Data are represented as fold change vs. vehicle normalized to GAPDH ( $n = 4-8$ ).
- B FGF21 in the media secreted from C2C12 myotubes treated either with vehicle, oligomycin, or tunicamycin ± PBA for 8 h ( $n = 3$ ).
- C mRNA expression of *Fgf21*, *Atf4*, and *BiP* in C2C12 myotubes treated with vehicle or oligomycin for 8 h (data are expressed as fold change vs. vehicle) ( $n = 4-6$ ).
- D Western blot analysis and densitometric quantification of phosphorylated AMPK normalized to total AMPK in C2C12 cells treated with vehicle or AICAR for 12 h ( $n = 4$ ).
- E FGF21 mRNA expression in C2C12 cells treated with vehicle or AICAR for 12 h ( $n = 3-4$ ). Data are represented as fold change vs. vehicle.

Data information: Data are expressed as means ± SEM. Significant differences were determined by Student's *t*-test (C, D), using a significance level of  $P < 0.05$  or by ANOVA followed by Tukey multiple comparison test (A, B), using a significance level of  $P < 0.05$ . (\*) Significantly different vs. vehicle. (\*) and (#) vs. oligomycin or tunicamycin.

Source data are available online for this figure.

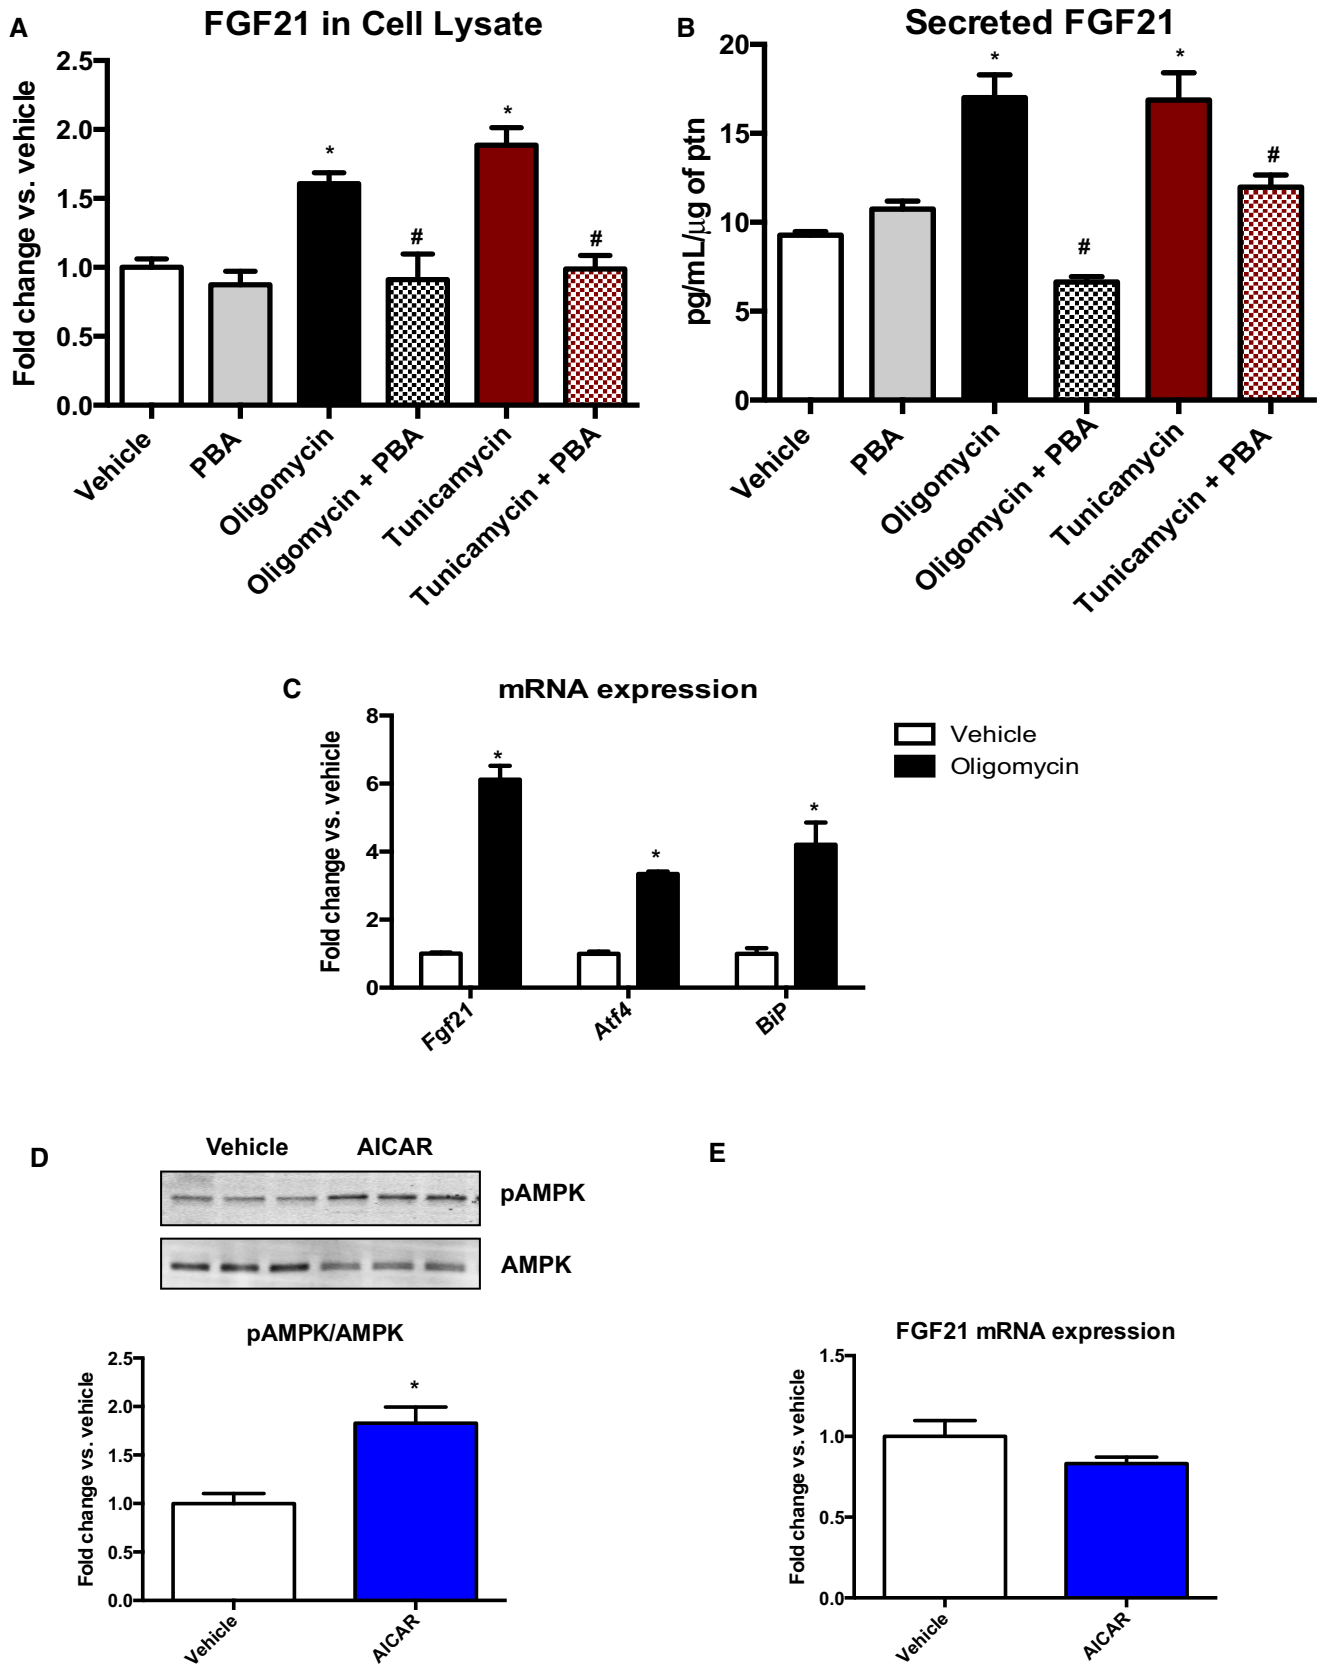

Figure EV5.
